# Supplementary material
Source: Springer Nature journal article supplement (https://www.springermedizin.de/resource/supplementary/12943_2014_1405_MOESM3_ESM.pdf/9552926)

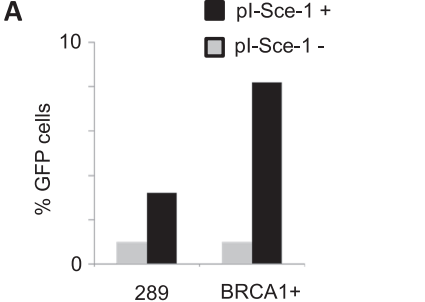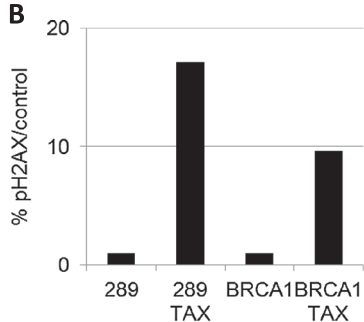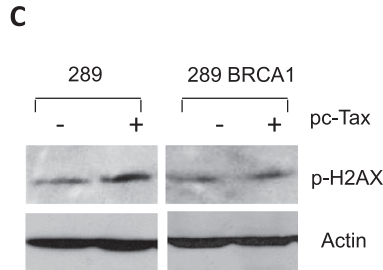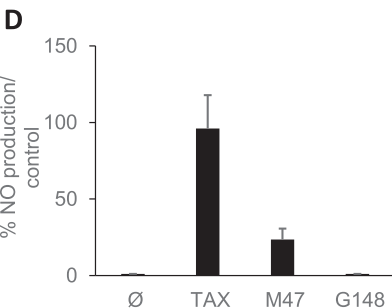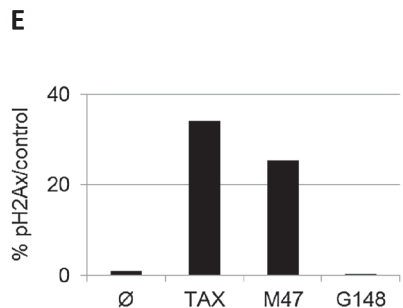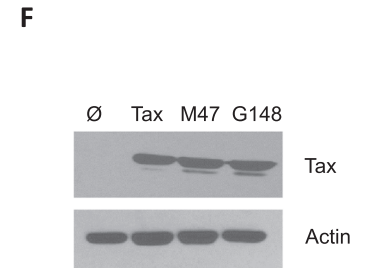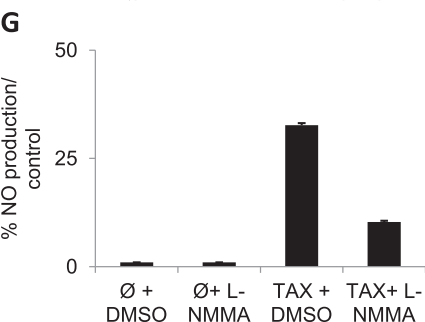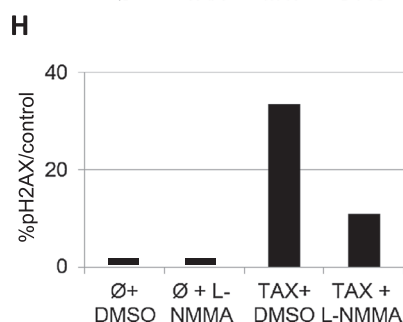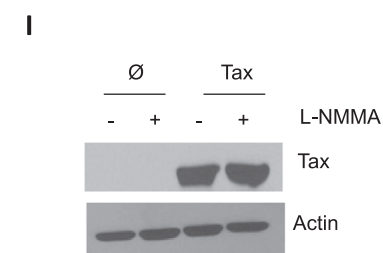

Supplement: MOESM3 [file 9552926]
